# Supplementary material for: 4-Methylcoumarin-bridged fluorescent responsive cryptand: from [2+2] photodimerization to supramolecular polymer
Source: Royal Society of Chemistry journal article supplement (doi:10.1039/c6cc03624d), 2016-01-01
Supplement: c6cc03624d1.pdf [file c6cc03624d1.pdf]

# 4-Methylcoumarin-bridged Fluorescent Responsive Cryptand: from [2+2]Photodimerization to Supramolecular Polymer

Ming Cheng,<sup>a</sup> Chenhao Yao,<sup>a</sup> Yihan Cao,<sup>a</sup> Qi Wang,<sup>a</sup> Yi Pan,<sup>b</sup> Juli Jiang,<sup>\*a</sup> and Leyong Wang<sup>\*a</sup>

<sup>a</sup> Key Laboratory of Mesoscopic Chemistry of MOE, School of Chemistry and Chemical Engineering, Nanjing University, Nanjing 210093, China, Fax: (+86) 25-83597090; <sup>b</sup> State Key Laboratory of Coordination Chemistry, School of Chemistry and Chemical Engineering, Nanjing University, Nanjing 210093, China

\*Corresponding Author: jjl@nju.edu.cn; lywang@nju.edu.cn

---

## SUPPORTING INFORMATION

### Table of Contents

|                                                                           |     |
|---------------------------------------------------------------------------|-----|
| 1. Materials and methods .....                                            | S2  |
| 2. Experimental procedures .....                                          | S2  |
| 3. Association constants and Job plots of 1 ⇌ 2 .....                     | S7  |
| 4. Concentration-dependent <sup>1</sup> H NMR spectroscopy of 3 ⇌ 4 ..... | S10 |
| 5. X-ray crystal data for cryptand 1 .....                                | S10 |
| 6. References .....                                                       | S11 |

## 1. Materials and methods

All reactions were performed in open atmosphere unless otherwise stated. All reagents, unless otherwise indicated, were obtained from commercial sources. Anhydrous  $\text{CH}_3\text{CN}$  was obtained by distillation from  $\text{CaH}_2$  under  $\text{N}_2$  atmosphere. Melting points (M.p.) were determined using a Focus X-4 apparatus and were not corrected. All yields were given as isolated yields. NMR spectra were recorded on a Bruker DPX 300 MHz or 400 MHz spectrometer with internal standard tetramethylsilane (TMS) and solvent signals as internal references, and the chemical shifts ( $\delta$ ) were expressed in ppm and  $J$  values were given in Hz. Low-resolution electrospray ionization mass spectra (LR-ESI-MS) were obtained on Finnigan MatTSQ 7000 instruments. High-resolution electrospray ionization mass spectra (HR-ESI-MS) were recorded on an Agilent 6540Q-TOF LCMS equipped with an electrospray ionization (ESI) probe operating in positive-ion mode with direct infusion.

## 2. Experimental procedures.

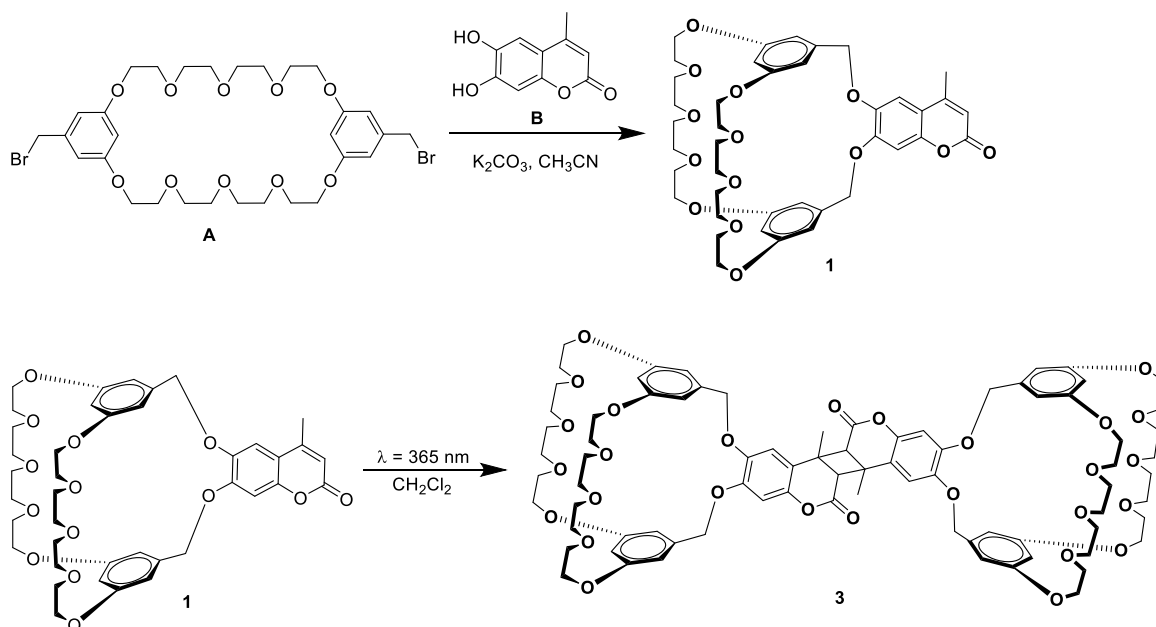

Scheme S1. Synthesis of cryptand 1 and dimer-cryptand 3.

**General procedure for the synthesis of cryptand 1:** A mixture of  $\text{A}^1$  (0.20 g, 0.28 mmol) and

compound **B** (0.053 g, 0.28 mmol) in anhydrous CH<sub>3</sub>CN was stirred and refluxed for 24 h. The reaction mixture was filtered. The filtrate was removed in vacuum and the residue was dissolved in CH<sub>2</sub>Cl<sub>2</sub>. The organic phase was washed with water, dried over anhydrous Na<sub>2</sub>SO<sub>4</sub> and concentrated under vacuum. The residue was purified by silica-gel column chromatography using (CH<sub>2</sub>Cl<sub>2</sub>/CH<sub>3</sub>OH, 100:1) to afford **1** (0.063 g, 30.0%) as a white solid. M.p.178-180 °C ; The <sup>1</sup>H NMR & <sup>13</sup>C NMR spectra of **1** are shown in Fig. S1-S2. <sup>1</sup>H NMR (400 MHz, CD<sub>3</sub>CN, 298K) δ (ppm): 7.23 (s, 1H), 7.04 (s, 1H), 6.57-6.56 (m, 4H), 6.45-6.42 (m, 2H), 6.15 (s, 1H), 4.89 (s, 4H), 4.13-3.93 (m, 8H), 3.88-3.67 (m, 8H), 3.58-3.54 (m, 16H), 2.42 (s, 3H); <sup>13</sup>C NMR (100 MHz, CDCl<sub>3</sub>, 298 K) δ (ppm): 161.4, 160.0, 159.9, 153.5, 152.4, 150.3, 145.9, 138.9, 137.6, 113.2, 112.6, 111.6, 106.2, 105.8, 102.4, 102.1, 102.0, 73.6, 71.5, 71.1, 70.7, 69.8, 69.7, 67.6, 67.4.; LR-ESI-MS: calcd. for [**1** + H]<sup>+</sup>: 753.31, found *m/z* = 753.20; [**1** + NH<sub>4</sub>]<sup>+</sup>: 770.34, found *m/z* = 770.20; [**1** + Na]<sup>+</sup>: 775.29, found *m/z* = 775.15; HR-MS (ESI): calcd. for [**1** + H]<sup>+</sup>: 753.3117, found *m/z* = 753.3119; [**1** + NH<sub>4</sub>]<sup>+</sup>: 770.3382, found *m/z* = 770.3387; [**1** + Na]<sup>+</sup>: 775.2936, found *m/z* = 775.2940.

**General procedure for the synthesis of dimer-cryptand 3:** Cryptand **1** (0.7 g, 0.92 mmol) was dissolved in 30 mL dichloromethane. Then the solution was exposed to a 500 W mercury lamp for 96 h. The residue was purified by silica-gel column chromatography using (CH<sub>2</sub>Cl<sub>2</sub>/CH<sub>3</sub>OH, 50:1) to afford **3** (0.030 g, 4.3%) as a white solid. M.p.93-95 °C ; The <sup>1</sup>H NMR & <sup>13</sup>C NMR spectra of **3** are shown in Fig. S5-S6. <sup>1</sup>H NMR (400 MHz, CD<sub>3</sub>CN, 298K) δ (ppm): 7.00 (s, 2H), 6.85 (s, 2H), 6.65-6.49 (m, 8H), 6.44-6.40 (m, 4H), 4.89 (d, *J* = 19.6 Hz, 8H), 4.05-3.92 (m, 16H), 3.71 (br, 16H), 3.55 (br, 32H), 3.42 (s, 2H), 1.36 (s, 6H); <sup>13</sup>C NMR (100 MHz, CD<sub>3</sub>CN, 298 K) δ (ppm): 165.9, 159.7, 159.6, 148.9, 145.7, 144.4, 138.6, 138.2, 114.4, 111.6, 107.6, 107.5, 107.5, 107.2, 102.1, 100.3, 100.2, 71.5, 71.0, 70.1, 69.9, 68.9, 67.3, 67.2, 46.7, 44.2, 25.5.; LR-ESI-MS: calcd. for [**3** + H]<sup>+</sup>: 1523.63, found *m/z* = 1523.30; [**3** + Na]<sup>+</sup>: 1527.60, found *m/z* = 1527.30; HR-MS (ESI): calcd. for [**3** + NH<sub>4</sub>]<sup>+</sup>: 1522.6426, found *m/z* = 1522.6422; [**3** + Na]<sup>+</sup>: 1527.5980, found *m/z* = 1527.5983.

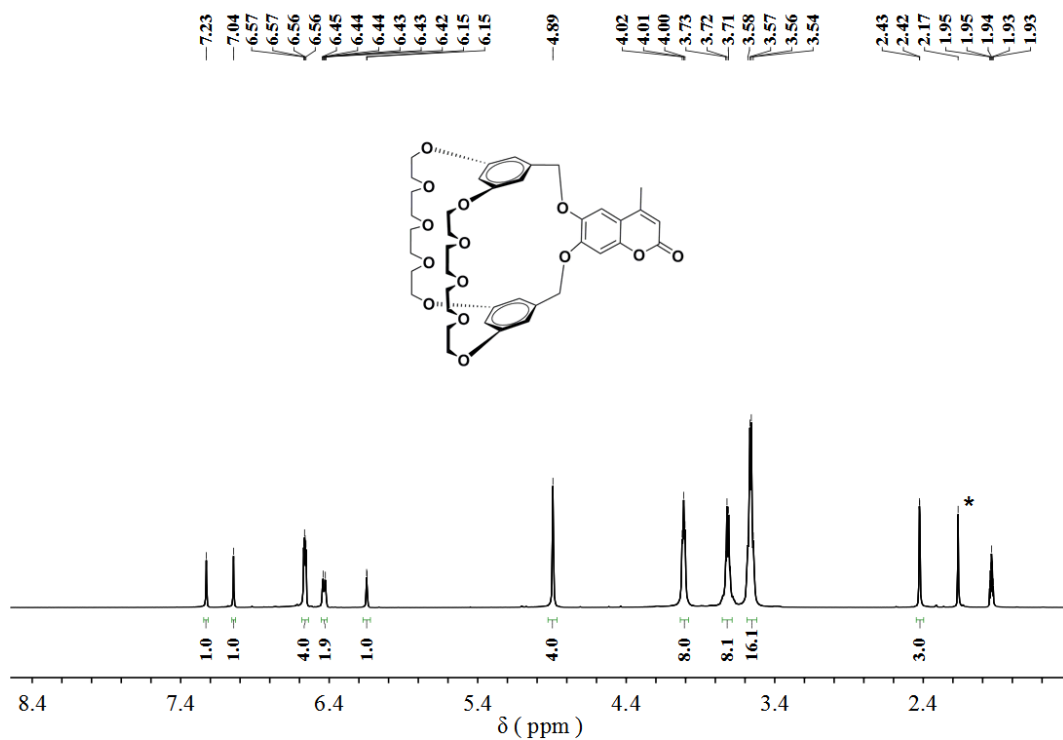

**Fig. S1**  $^1\text{H}$  NMR spectrum (400 MHz,  $\text{CD}_3\text{CN}$ , 298 K) of cryptand **1**. (\* signals of  $\text{H}_2\text{O}$ ).

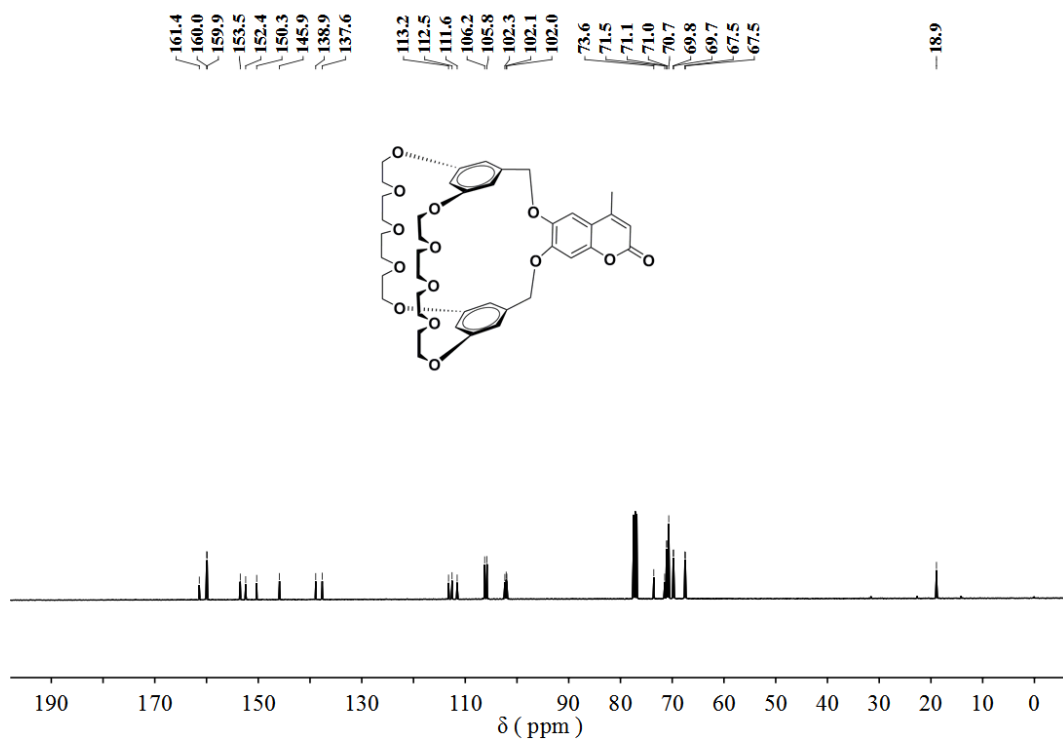

**Fig. S2**  $^{13}\text{C}$  NMR spectrum (100 MHz,  $\text{CDCl}_3$ , 298 K) of cryptand **1**.

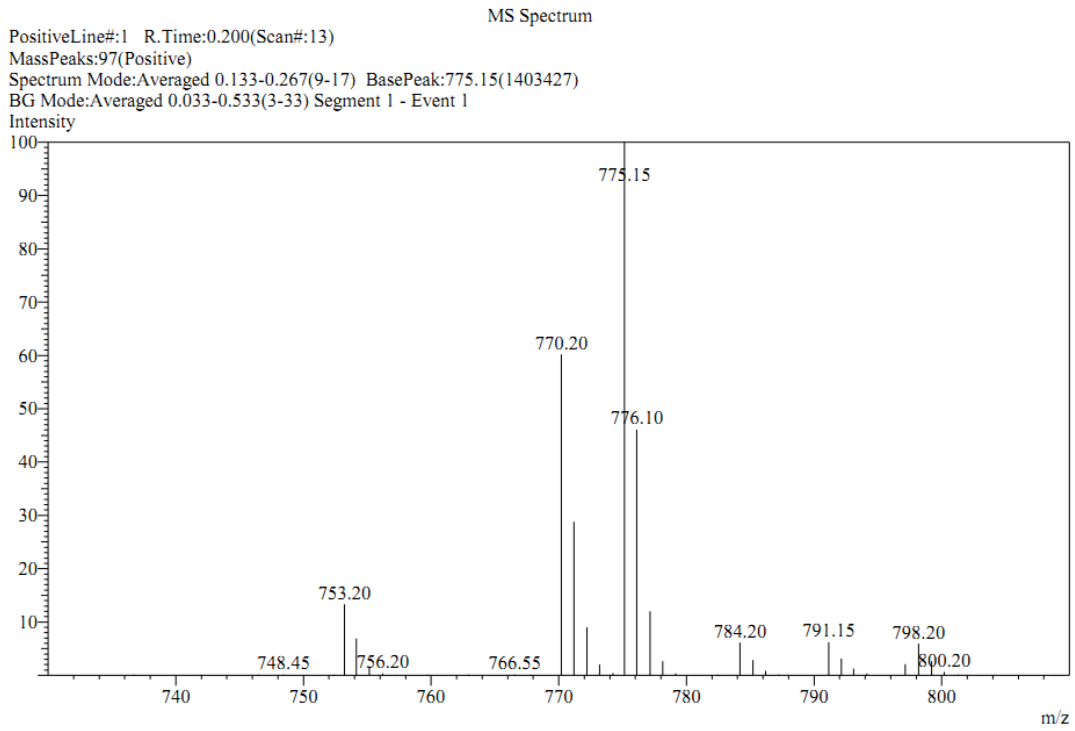

**Fig. S3** LR-ESI-MS of cryptand **1**.

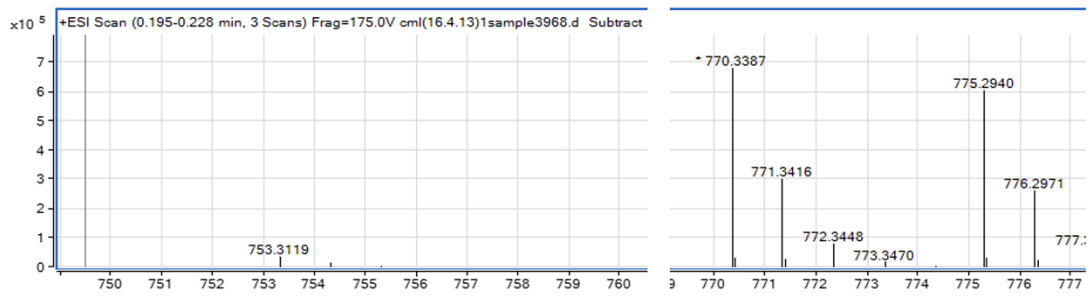

**Fig. S4** HR-ESI-MS of cryptand **1**

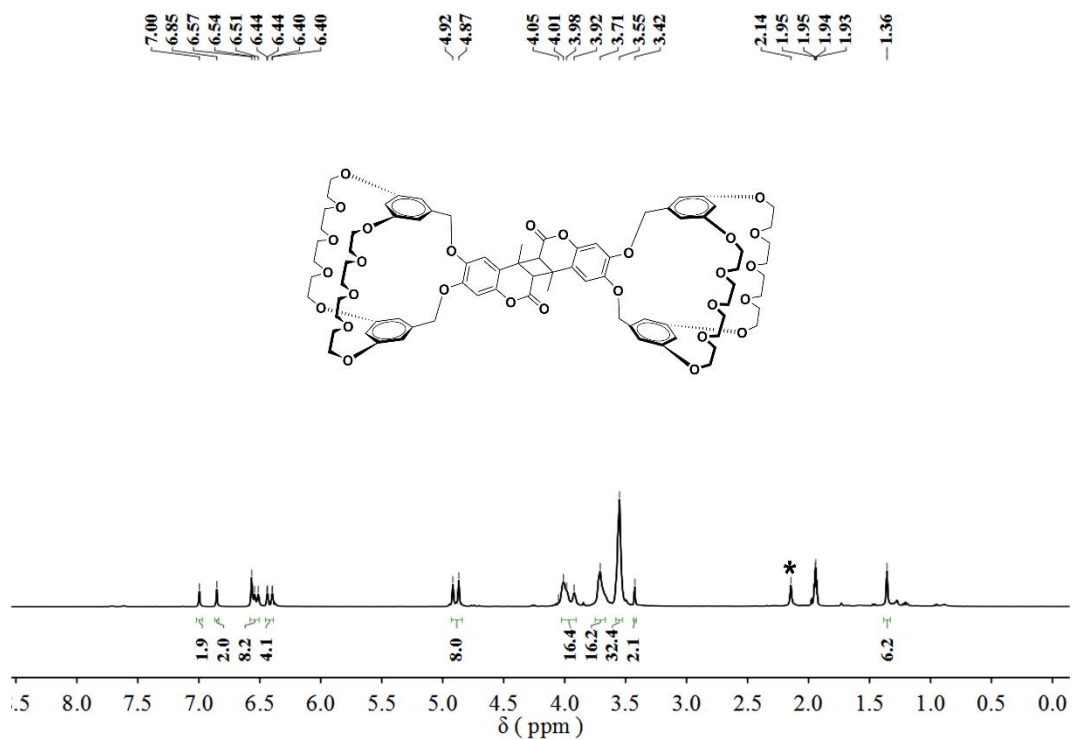

**Fig. S5**  $^1\text{H}$  NMR spectrum (400 MHz,  $\text{CD}_3\text{CN}$ , 298 K) of dimer-cryptand **3**. (\* signals of  $\text{H}_2\text{O}$ ).

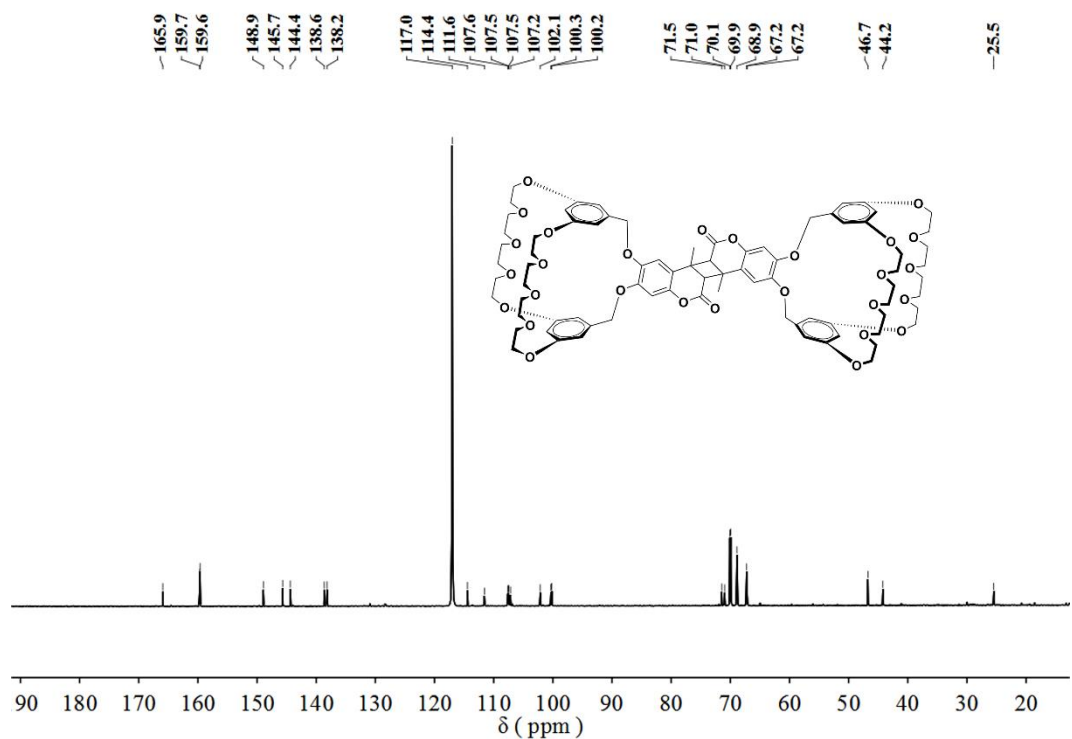

**Fig. S6**  $^{13}\text{C}$  NMR spectrum (100 MHz,  $\text{CD}_3\text{CN}$ , 298 K) of dimer-cryptand **3**.

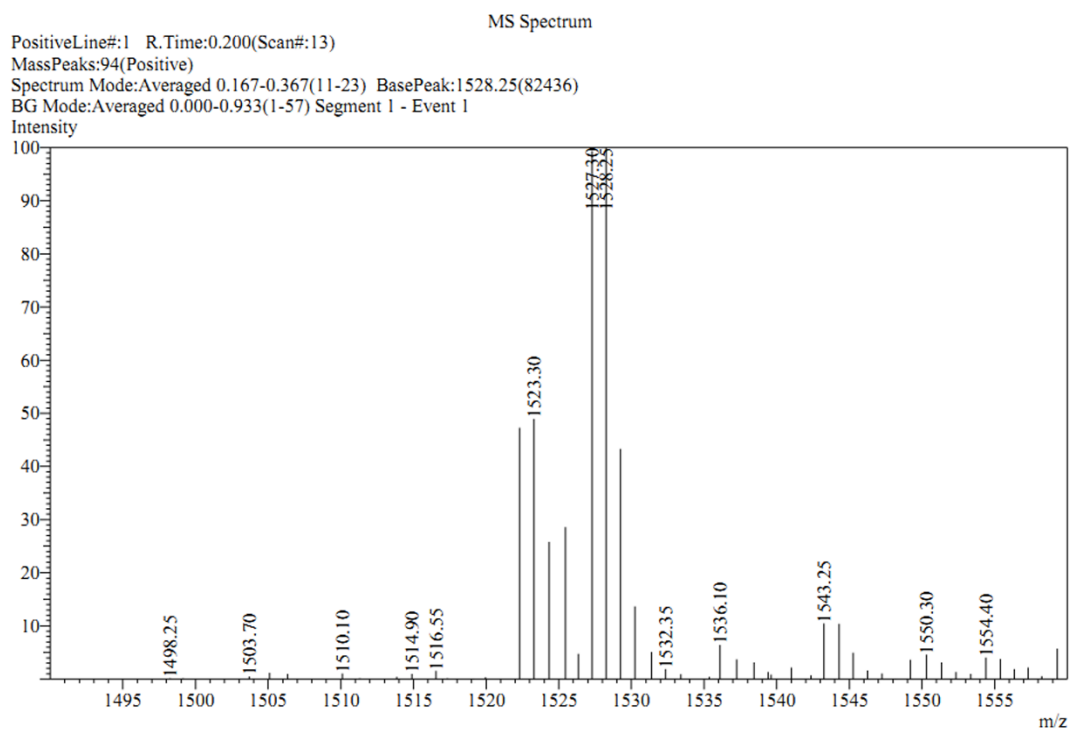

**Fig. S7** LR-ESI-MS of dimer-cryptand **3**.

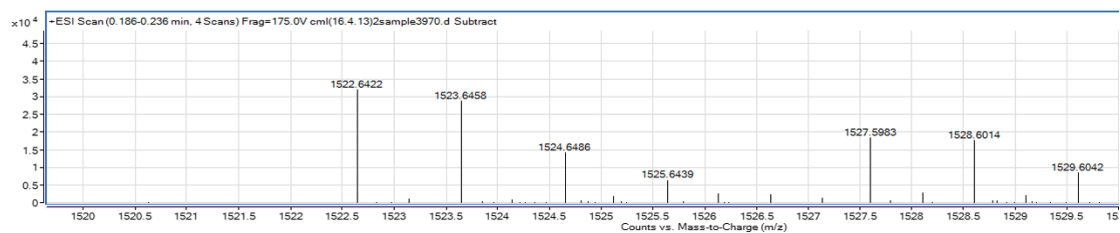

**Fig. S8** HR-ESI-MS of dimer-cryptand **3**.

### 3. Association constants and Job plots of $1 \supset 2$ .

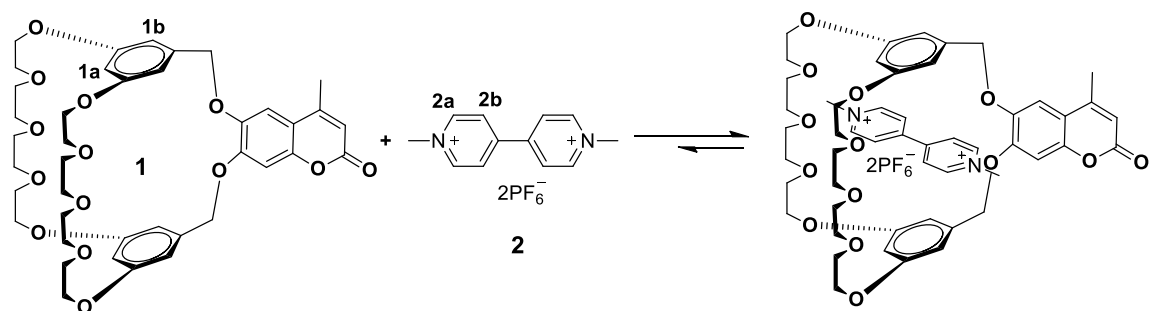

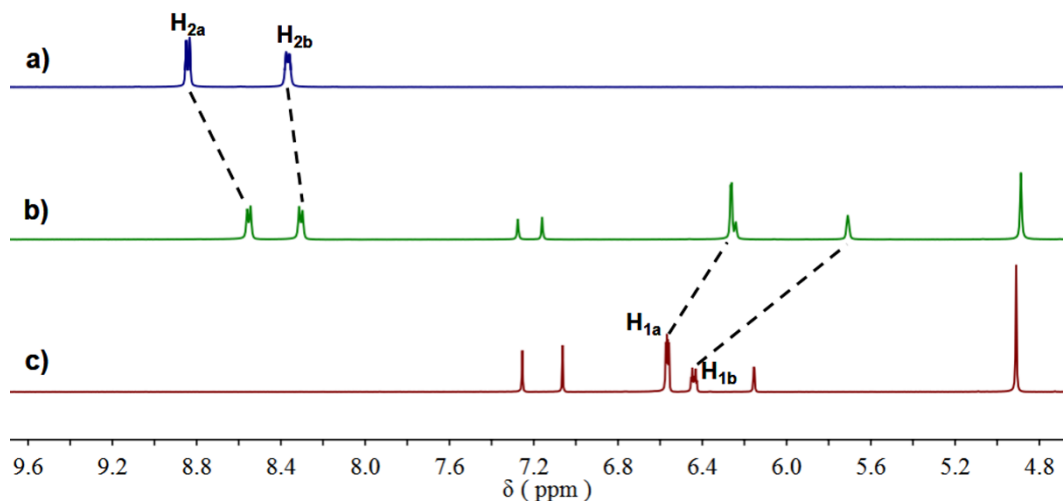

**Fig. S9** Partial  $^1\text{H}$  NMR spectra (400 MHz,  $\text{CD}_3\text{CN}$ , 298 K): (a) **2**; (b) 10.00 mM **1** and 10.00 mM **2**; (c) **1**.

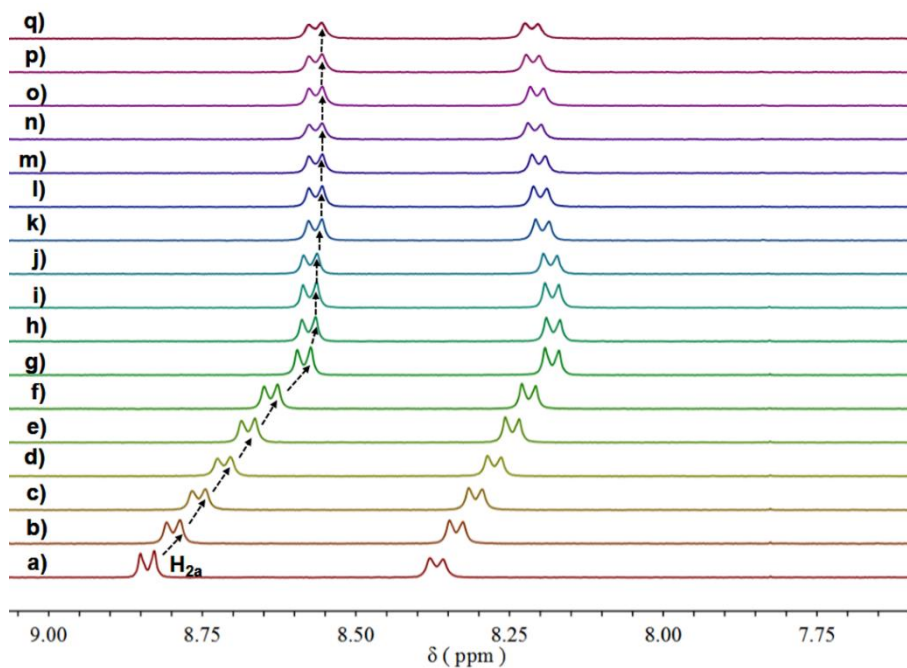

**Fig. S10** Partial  $^1\text{H}$  NMR spectra changes (300 MHz,  $\text{CDCl}_3/\text{CD}_3\text{CN} = 1/1(\text{v/v})$ , 298 K) of **2** (guest, 2.00 mM) upon addition of **1** (host): (a) 0.00, (b) 0.40, (c) 0.80, (d) 1.20, (e) 1.60, (f) 2.00, (g) 3.00, (h) 5.00, (i) 7.00, (j) 9.00, (k) 13.00, (l) 17.00, (m) 20.00, (n) 24.00, (o) 30.00, (p) 36.00, (q) 40.00 mM.



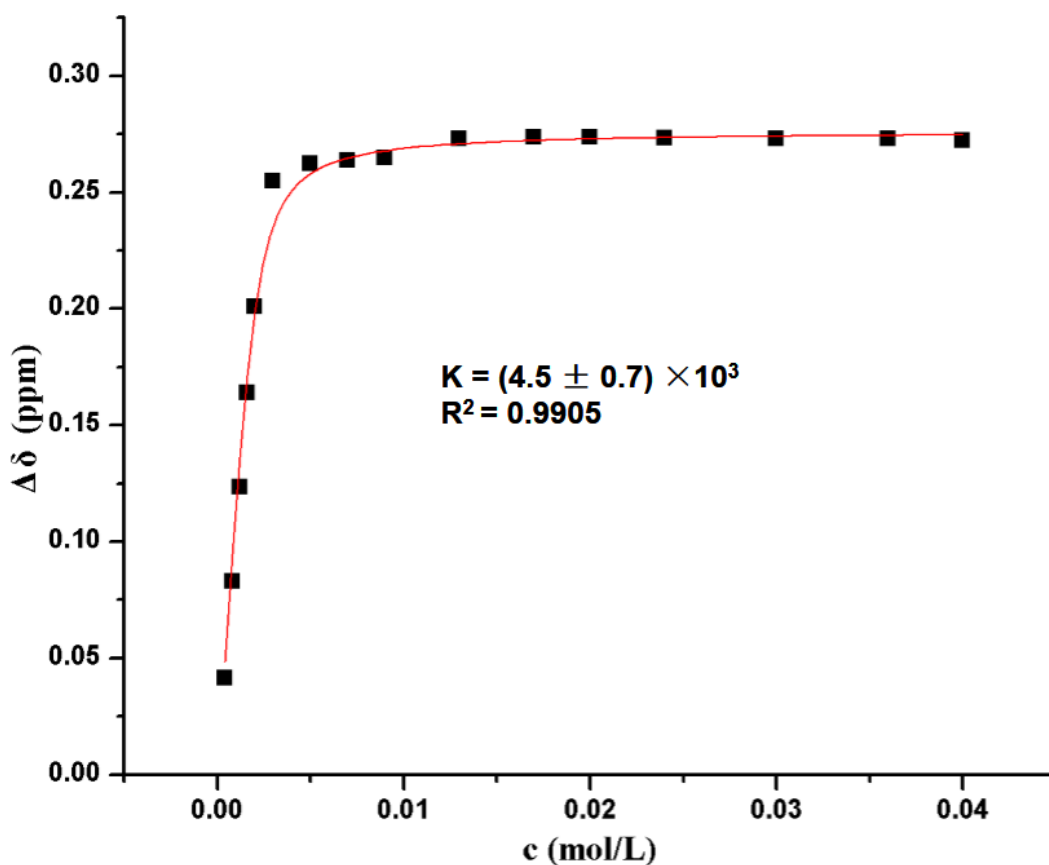

**Fig. S11** The non-linear curve-fitting (NMR titrations) for the complexation of **2** (guest) with **1** (host) in  $\text{CDCl}_3/\text{CD}_3\text{CN} = 1/1$  (v/v) at 298 K. Using the signal of **2** at  $\delta$  8.8281 (proton  $\text{H}_{2a}$ ) as the reference. The association constant ( $K_a$ ) of **2**  $\subset$  **1** in  $\text{CDCl}_3/\text{CD}_3\text{CN} = 1/1$ (v/v) was estimated to be about  $(4.5 \pm 0.7) \times 10^3 \text{ M}^{-1}$ .

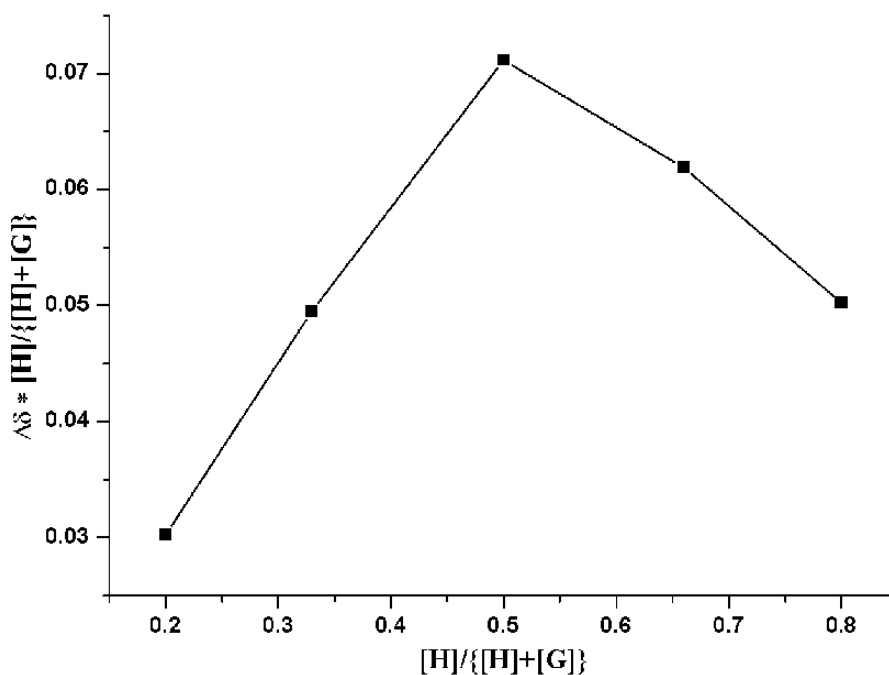

**Fig. S12** The Job Plot (NMR titrations) for the complexation of **1** (host) with **2** (guest) in  $\text{CD}_3\text{CN}$  at 298 K. ( $[\text{H}] + [\text{G}] = 8 \text{ mM}$ ).

#### 4. Concentration-dependent $^1\text{H}$ NMR spectroscopy of **3** $\rightleftharpoons$ **4**.

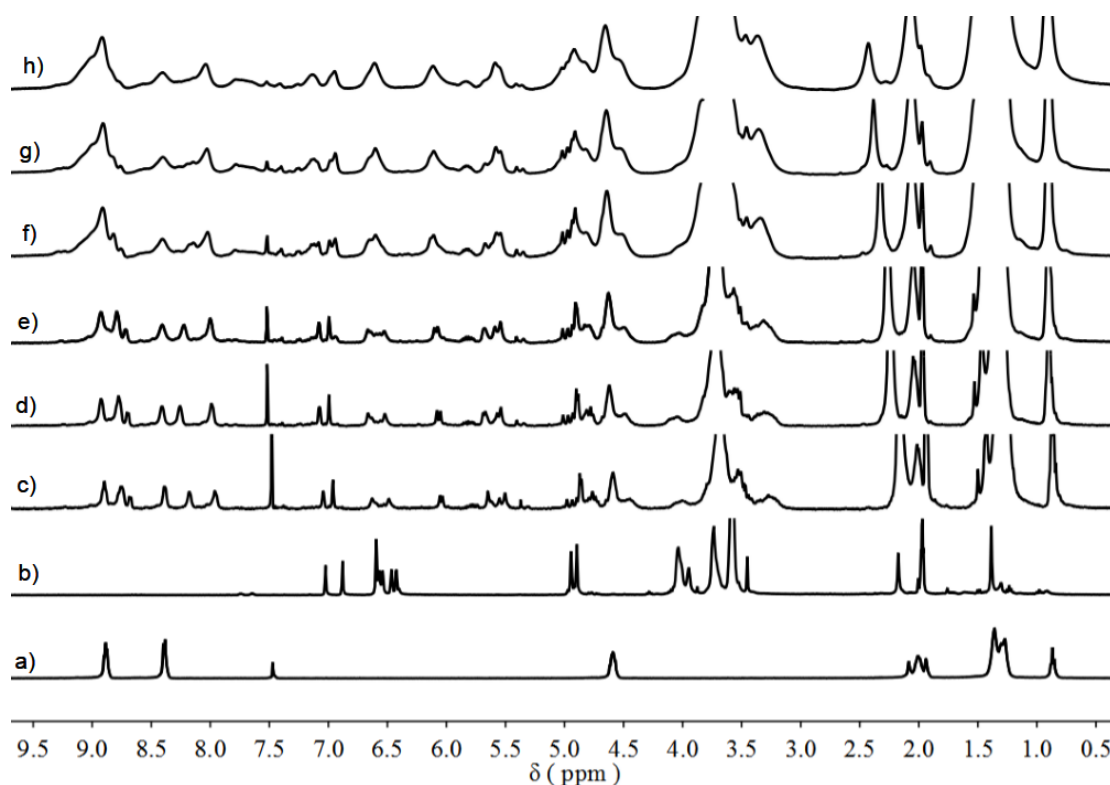

**Fig. S13**  $^1\text{H}$  NMR spectra (400 MHz, 298 K) of (a) individual **4** ( $\text{CDCl}_3/\text{CD}_3\text{CN}$ , 1/1, v/v); (b) individual **3** ( $\text{CD}_3\text{CN}$ ); mixtures of **3** and **4** in a 1 : 1 molar ratio at different **3** concentrations ( $\text{CDCl}_3/\text{CD}_3\text{CN}$ , 1/1, v/v): (c) 5, (d) 10, (e) 20, (f) 40, (g) 60, (h) 74 mM

#### 5. X-ray crystal data for cryptand **1**.

**Table 1.** Crystal data and structure refinement for cryptand **1**.

|                   |                                           |
|-------------------|-------------------------------------------|
| CCDC number       | 1449565                                   |
| Empirical formula | $\text{C}_{40}\text{H}_{48}\text{O}_{14}$ |
| Formula weight    | 752.81                                    |
| Temperature       | 296(2)                                    |
| Wavelength        | 0.71073 Å                                 |
| Crystal system    | Triclinic                                 |
| Space group       | P-1                                       |
| a                 | 13.5950(13) Å                             |
| b                 | 20.8235(19) Å                             |
| c                 | 23.687(2) Å                               |

|                                      |                                             |
|--------------------------------------|---------------------------------------------|
| $\alpha$                             | 74.639(2) °                                 |
| $\beta$                              | 84.656(2) °                                 |
| $\gamma$                             | 76.364(2) °                                 |
| Volume                               | 6280.4(10) Å <sup>3</sup>                   |
| Z                                    | 4                                           |
| Density (calculated)                 | 1.300                                       |
| Absorption coefficient               | 0.164                                       |
| F(000)                               | 2552                                        |
| Crystal size                         | 0.26 × 0.24 × 0.22 mm <sup>3</sup>          |
| Theta range for data collection      | 2.03 to 25.01 °                             |
| Index ranges                         | -16 ≤ h ≤ 11, -24 ≤ k ≤ 24,<br>-28 ≤ l ≤ 28 |
| Reflections collected                | 39583                                       |
| Independent reflections              | 21877 [R(int) = 0.0365]                     |
| Completeness to theta = 25.01 °      | 98.7%                                       |
| Absorption correction                | multi-scan                                  |
| Refinement method                    | Full-matrix least-squares on $F^2$          |
| Goodness-of-fit on $F^2$             | 1.184                                       |
| Final R indices [ $I > 2\sigma(I)$ ] | R1 = 0.0893, wR2 = 0.1740                   |
| R indices (all data)                 | R1 = 0.1375, wR2 = 0.1904                   |
| Largest diff. peak and hole          | 1.440 and -1.021 e Å <sup>-3</sup>          |

## 6. References

1. X. Ji, M. Zhang, X. Yan, J. Li and F. Huang, *Chem. Commun.*, 2013, **49**, 1178-1180.
